# Supplementary material for: Super-adsorbent microspheres based on a triallyl isocyanurate–maleic anhydride copolymer for the removal of organic pollutants from water
Source: Royal Society of Chemistry journal article supplement (doi:10.1039/d2nr07124j), 2023-01-01
Supplement: d2nr07124j1.pdf [file d2nr07124j1.pdf]

## Supplementary Information

### **Super-adsorbent microsphere based on triallyl isocyanurate-maleic anhydride copolymer for removal of organic pollutants from water**

Can Xu,<sup>a</sup> Hongyi Shu,<sup>a</sup> Chuxuan Chen,<sup>a</sup> Xi Qi,<sup>a</sup> Pengfei Zhou,<sup>b</sup> YuhongMa,<sup>a,c</sup>

Changwen Zhao,<sup>\*a</sup> and Wantai Yang <sup>\*a,c,d</sup>

<sup>a</sup>State Key Laboratory of Chemical Resource Engineering, Beijing University of Chemical Technology, Beijing, 100029, China

<sup>b</sup>Shandong Dongyue Polymer Material Co., Ltd.

<sup>c</sup>Beijing Engineering Research Center for the Synthesis and Applications of Waterborne Polymers, Beijing University of Chemical Technology, Beijing, 100029, China

<sup>d</sup>Key Laboratory of Carbon Fiber and Functional Polymers, Ministry of Education, Beijing University of Chemical Technology, Beijing, 100029, China

\*Corresponding authors: yangwt@mail.buct.edu.cn, zhaocw@mail.buct.edu.cn

After diluted, the standard curve of DS solution was drawn by measuring the corresponding absorbance value.

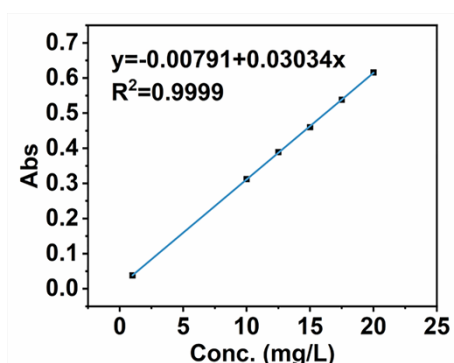

**Fig. S1.** Standard curve of DS solution

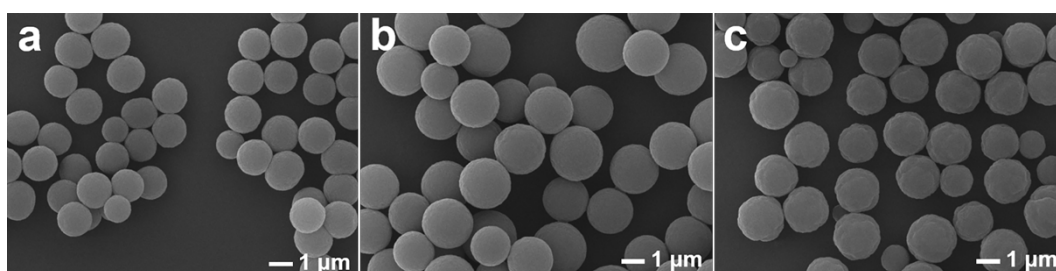

**Fig. S2.** SEM images of TMs (TAIC/MAH=1/1, 1/2, 1/3, respectively), polymerization solvents: IPA/CH=5/5.

**Table S1.** Elemental Content and composition of TAIC-MAH Copolymer Synthesized at Different Feeding Ratio Measured by EA.

| Entry | Elemental content (wt %) |      |       |
|-------|--------------------------|------|-------|
|       | C                        | H    | N     |
| 1     | 53.37                    | 4.95 | 10.18 |
| 2     | 52.57                    | 4.79 | 9.12  |
| 3     | 51.74                    | 4.80 | 8.43  |

**Table S2.** Specific surface area and pore size distribution of TMs before and after

| cationic modification |                                         |                                           |                       |                                            |                                            |                                           |
|-----------------------|-----------------------------------------|-------------------------------------------|-----------------------|--------------------------------------------|--------------------------------------------|-------------------------------------------|
| Sample                | $S_{\text{BET}}$<br>(m <sup>2</sup> /g) | $S_{\text{micro}}$<br>(m <sup>2</sup> /g) | Pore Diameter<br>(nm) | $V_{\text{total}}$<br>(cm <sup>3</sup> /g) | $V_{\text{micro}}$<br>(cm <sup>3</sup> /g) | $V_{\text{micro}}/$<br>$V_{\text{total}}$ |
| TMs1                  | 182.39                                  | 5.68                                      | 3.818                 | 0.147                                      | 0.001                                      | 0.007                                     |
| TMs2                  | 71.63                                   | 15.25                                     | 3.396                 | 0.151                                      | 0.007                                      | 0.046                                     |
| TMs3                  | 51.60                                   | 2.088                                     | 3.391                 | 0.073                                      | 0                                          | 0                                         |
| Cat-TMs1              | 14.91                                   | 0                                         | 3.806                 | 0.485                                      | 0                                          | 0                                         |
| Cat-TMs2              | 8.65                                    | 0                                         | 3.796                 | 0.061                                      | 0                                          | 0                                         |
| Cat-TMs3              | 4.24                                    | 0                                         | 3.797                 | 0.029                                      | 0                                          | 0                                         |

### Determination of the density of ammonium cation.

Assuming the presence of one chloride counter ion per ammonium cation, the accurate density of cation in Cat-TMs was determined by titration of chloride with AgNO<sub>3</sub>. The titration process was as follows: Cat-TMs (50.0 mg) were dispersed in a standard aqueous NaOH solution (0.2 M, 20.00 mL) in an Erlenmeyer flask. The mixture was dispersed with ultrasonic vibration for 30 min and then was stirred with a magnetic stirrer for 12 h at room temperature and then centrifuged. The supernatant was diluted to a constant volume of 40 mL with distilled water. 20 mL of the supernatant solution was taken out, and the pH value of the solution was adjusted to 6.5-8.0 with 0.01 mol/L HNO<sub>3</sub>. The content of Cl<sup>-</sup> was determined by titration with a 0.1 mol/L AgNO<sub>3</sub> solution using K<sub>2</sub>CrO<sub>4</sub> as the indicator. The molar concentration of ammonium cation is equal to that of Cl<sup>-</sup>, and the density of cation in Cat-TMs can be calculated using the following equation:

$$d = 2 \times \frac{V_{\text{Ag}} \times C_{\text{Ag}}}{W} \quad (1)$$

where  $C_{Ag}$  (mol/L) was the concentration of the aqueous  $AgNO_3$  solution.  $V_{Ag}$  (mL) was the volume of  $AgNO_3$  used in the titration.  $W$  was the weight of the Cat-TMs (g).

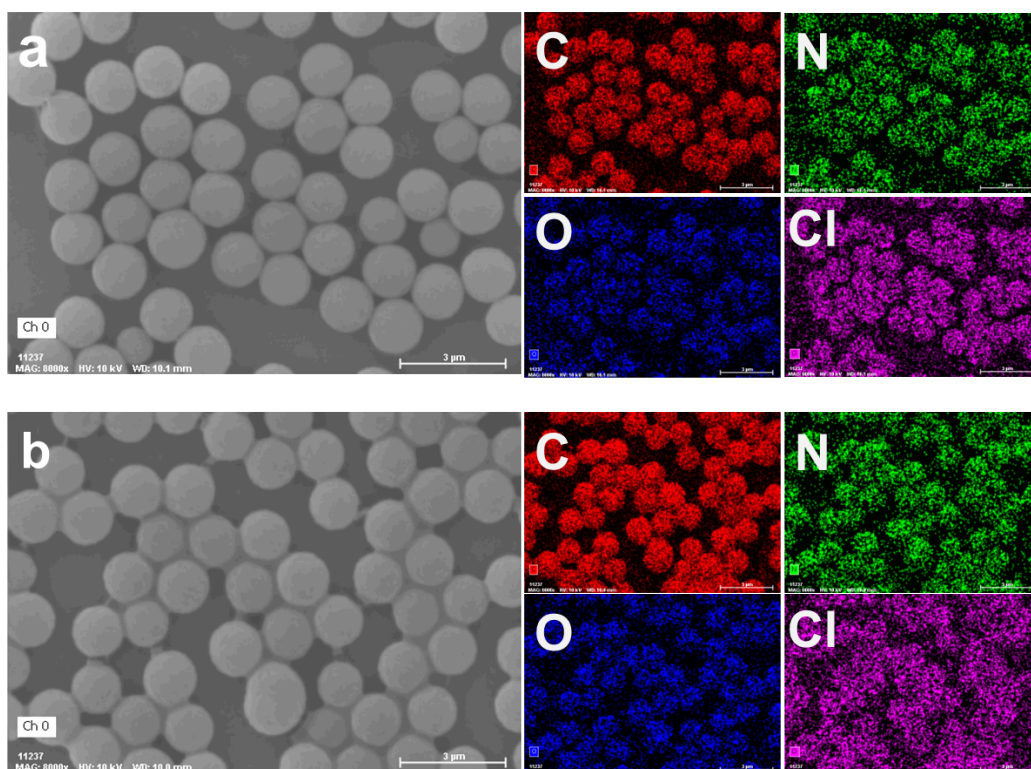

**Fig. S3.** EDS mapping of Cat-TMs before (a) and after adsorption (b).

**Table S3.** Elemental content of Cat-TMs before and after adsorption.

| Sample                    | Elemental content (wt %) |       |       |      |
|---------------------------|--------------------------|-------|-------|------|
|                           | C                        | N     | O     | Cl   |
| Cat-TMs before adsorption | 51.00                    | 22.98 | 14.67 | 11.3 |
| Cat-TMs after adsorption  | 55.77                    | 22.41 | 15.93 | 7    |

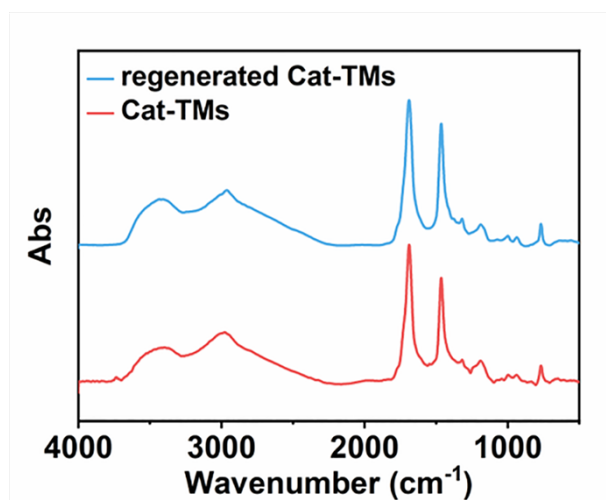

**Fig. S4.** FT-IR spectra of regenerated Cat-TMs.

The as-prepared adsorbent (Cat-TMs, 0.1 g) was immersed in acidic (pH=2), neutral (pH=7) and alkaline (pH=12) aqueous solution (10 mL) to test the stability in different pH (denoted as sample 1, 2, 3). After 12 hours, samples were centrifuged then dried for FT-IR characterization and DS adsorption experiments. The sample 1, 2, 3 were treated by 1 mol/L HCl to protonate them and dried to test the adsorption capacity.

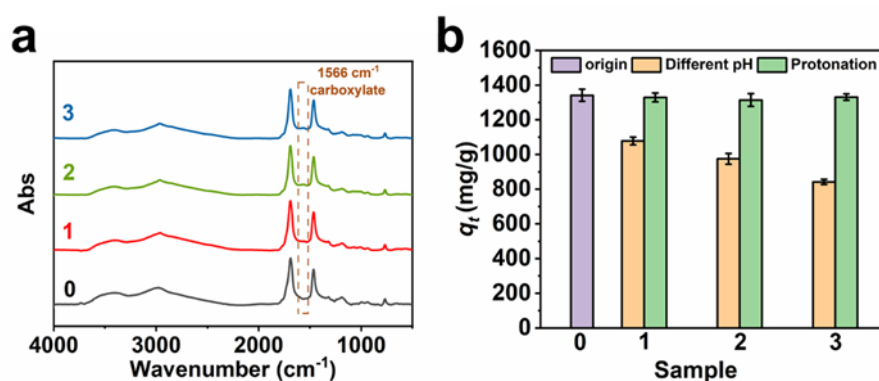

**Fig. S5.** (a) FT-IR spectra of sample 1, 2, 3, and (b) equilibrium adsorption capacity of sample 1, 2, 3 and retreated sample 1, 2, 3.

Similarly, Cat-TMs were immersed in ethanol, tetrahydrofuran, and xylene,

respectively to check the stability in different solvents (denoted as sample 4, 5, 6).

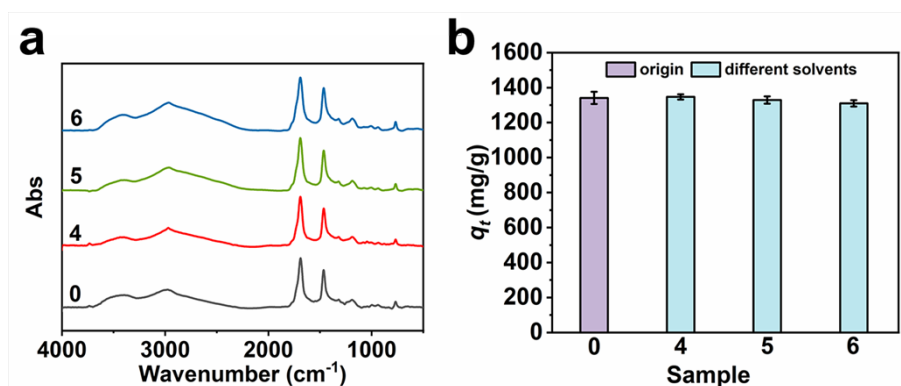

**Fig. S6.** (a) FT-IR spectra of sample 4, 5, 6, and (b) equilibrium adsorption capacity of sample 4, 5, 6.
